1 **Classification:** Biological Sciences: Microbiology

2

3 **Title:** Ligand-Mediated Biofilm Formation via Enhanced Physical Interaction Between a  
4 Diguanylate Cyclase and Its Receptor

5

6 **Authors:** David Giacalone<sup>1</sup>, T. Jarrod Smith<sup>1</sup>, Alan J. Collins<sup>1</sup>, Holger Sondermann<sup>3</sup>, Lori J. Koziol<sup>2</sup>,  
7 and George A. O'Toole<sup>1</sup>

8

9 **Author Affiliations:**

10 <sup>1</sup>Department of Microbiology and Immunology, Geisel School of Medicine at Dartmouth,  
11 Hanover, NH 03755

12 <sup>2</sup>Department of Biology, New England College, Henniker, NH 03242

13 <sup>3</sup>Department of Molecular Medicine, College of Veterinary Medicine, Cornell University, Ithaca,  
14 NY 14853

15

16 **Corresponding author:** George A. O'Toole; address: Geisel School of Medicine at Dartmouth,  
17 Dept. of Microbiology and Immunology, Remson 202, 66 North College St., Hanover, NH 03755;  
18 phone: 603-650-1248; email: [georgeo@Dartmouth.edu](mailto:georgeo@Dartmouth.edu)

19

20 **Key words:** biofilm, c-di-GMP, receptor, *Pseudomonas fluorescens*, CACHE domain, signaling

21 **Abstract.** The second messenger, cyclic dimeric GMP (c-di-GMP) regulates biofilm formation  
22 and surface attachment for many bacteria. Biofilm formation of *Pseudomonas fluorescens* Pf0-  
23 1 is controlled by the transfer of c-di-GMP to the inner-membrane protein, LapD. LapD-bound  
24 c-di-GMP in turn inhibits proteolytic cleavage of the adhesin LapA by the periplasmic protease  
25 LapG, which allows localization of LapA to the cell surface and thereby promotes biofilm  
26 formation. LapD is central to a complex network of c-di-GMP-mediated biofilm formation. In  
27 this study, we examine how signaling specificity of c-di-GMP by a DGC is achieved by small  
28 ligand sensing through characterization of the calcium channel chemotaxis (CACHE) receptor of  
29 the DGC, GcbC. We provide evidence that biofilm formation is enhanced by the  
30 environmentally relevant organic acid citrate, in a GcbC-dependent manner through enhanced  
31 LapA localization to the cell surface. In the presence of citrate, the GcbC shows enhanced  
32 physical interaction with LapD. GcbC also shows increased c-di-GMP production when LapD is  
33 present, and this enhanced GcbC-LapD interaction by citrate further drives c-di-GMP synthesis.  
34 Given that LapD can interact with a dozen different DGCs of *P. fluorescens*, many of which have  
35 ligand-binding domains, the ligand-mediated enhanced signaling of LapD-GcbC described here  
36 is likely a conserved mechanism of signaling in this network.

37

38 **Significance Statement.** Biofilm formation is a highly regulated event controlled by c-di-GMP  
39 signaling. In many bacteria, dozens of DGCs produce this dinucleotide signal, however it is  
40 unclear how undesired cross-talk is mitigated in the context of this soluble signal, and how c-di-  
41 GMP signaling is regulated in the context of environmental inputs. Here we show a ligand-  
42 mediated mechanism of signaling specificity whereby citrate enhances catalysis of the c-di-GMP  
43 synthesizing diguanylate cyclase (DGC) via increased physical interaction with its cognate  
44 receptor. We envision a scenario wherein a “cloud” of weakly interacting DGCs can increase  
45 specific interaction with their receptor in response to appropriate environmental signals,  
46 concomitantly boosting c-di-GMP production, ligand-specific signaling and biofilm formation.

47

## 48 **Text**

49 For most bacteria, surface attachment and biofilm formation is a highly regulated event (1, 2).  
50 The bacterial intracellular second messenger, cyclic dimeric GMP (c-di-GMP) regulates biofilm  
51 formation by regulating a diversity of biofilm-relevant outputs, including surface attachment  
52 (3), flagellar motility (4), extracellular polysaccharide production (5, 6), adhesin localization (7),  
53 and transcriptional control of pathways important for attachment (8). An important research  
54 theme has been the focus on c-di-GMP signaling specificity in the context of microbes that can  
55 have >50 proteins that make, degrade and bind this second messenger.

56 Biofilm formation by *Pseudomonas fluorescens* Pf0-1 occurs when the adhesin LapA localizes to  
57 the cell surface (9). LapA is maintained on the cell surface when the inner membrane protein

58 LapD binds c-di-GMP, which in turn inhibits cleavage of LapA by the periplasmic protease LapG  
59 (10, 11). The c-di-GMP-bound LapD sequesters LapG, thus this protease is not available to  
60 target the N-terminal cleavage site of LapA (11). One example of how c-di-GMP is specifically  
61 transferred to the LapD receptor is by physical interaction with a diguanylate cyclase (DGC)  
62 (12). The DGC called GcbC has been shown to physically interact with LapD, a c-di-GMP  
63 receptor located in the inner membrane, utilizing a surface exposed  $\alpha$ -helix of the GGDEF  
64 domain on GcbC and the surface exposed  $\alpha$ -helix of the EAL domain of LapD (12). This direct  
65 interaction model was proposed as one means to confer signaling specificity.

66 GcbC is an inner membrane protein that contains a calcium channel chemotaxis receptor  
67 (CACHE) located N-terminal to its GGDEF domain. CACHE domains are responsible for small  
68 ligand sensing (13). Many signal transduction proteins, including DGCs and histidine kinases,  
69 contain CACHE domains (14). GcbC, along with five other DGCs encoded on the *P. fluorescens*  
70 Pf0-1 genome (Pfl01\_2295, Pfl01\_2297, Pfl01\_1336, Pfl01\_3550, and Pfl01\_3800), contains a  
71 CACHE domain located N-terminally to the GGDEF domain, suggesting that these six DGCs are  
72 capable of sensing and responding to small ligands. The predicted domain organization of  
73 GcbC, Pfl01\_2295, and Pfl01\_2297 are shown in Figure 1A.

74 In this study, we analyze the CACHE domain of GcbC and identify the environmentally relevant  
75 organic acid citrate as a ligand for this DGC. We show citrate-enhanced physical interaction  
76 with GcbC and LapD, and that this enhanced interaction promotes increased c-di-GMP synthesis  
77 by GcbC, thereby promoting biofilm formation. We propose that ligand-mediated  
78 enhancement of DGC interactions with a receptor could serve as a general mechanism to  
79 confer specificity to this complex signaling network.

80

## 81 Results

82 **Citrate-mediated Biofilm Enhancement is Dependent on GcbC Activity.** We identified a CACHE  
83 domain in the periplasmic loop of GcbC (Figure 1A). To identify small molecules that the CACHE  
84 domain of GcbC may bind, we performed a CLUSTAL alignment of the amino acid sequence of  
85 CACHE domains of known structure (15). GcbC showed the highest amino acid similarity to  
86 rpHK1S-Z16 (PDB ID: 3LIF) of *Rhodopseudomonas palustris* with 31% identity (Fig. S1). When  
87 crystallized, the CACHE domain of rpHK1S-Z16 was bound to citrate and methyl-2,4-  
88 pentanediol, two small ligands recruited from the crystallization cocktail (15).

89 In a previous study, citrate was shown to act as a calcium chelator thus inhibiting proteolytic  
90 cleavage of LapA by LapG, and thereby stimulating biofilm formation (16). However, in a *lapG*  
91 mutant, citrate was capable of further stimulating biofilm levels (16) thus suggesting there was  
92 a second role for citrate in promoting biofilm formation, a conclusion supported by the putative  
93 small molecule-binding sites present in GcbC. To investigate this point, we tested the ability of  
94 citrate to promote biofilm formation by *P. fluorescens* Pf0-1. Citrate-mediated enhancement of  
95 biofilm formation observed for the wild-type (WT) strain was abolished in the *gcbC* mutant (Fig.

96 1B), suggesting that citrate-mediated enhancement of biofilm formation is dependent on the  
97 presence of GcbC. We selected Pfl01\_2295 and Pfl01\_2297 to serve as controls to determine if  
98 other CACHE domains also respond to citrate to promote biofilm formation. We used a low  
99 biofilm forming *P. fluorescens* Pf0-1 strain, lacking four DGCs, referred to as  $\Delta$ 4DGC, which  
100 shows minimal biofilm formation; the four DGCs deleted in the  $\Delta$ 4DGC strain, identified  
101 previously, are *gcbA*, *gcbB*, *gcbC*, and *wspR* (17). Of these three CACHE domain-containing  
102 DGCs expressed in the  $\Delta$ 4DGC mutant background (GcbC, Pfl01\_2295, and Pfl01\_2297), only  
103 the strain expressing GcbC responded to citrate with increased biofilm formation (Fig. 1C).  
104 GcbC synthesizes c-di-GMP via the GGDEF motif and mutation of this motif to GGAAF eliminates  
105 synthesis of c-di-GMP but this mutant variant is stably expressed (17). When GcbC-GGAAF was  
106 expressed in the  $\Delta$ 4DGC mutant background, biofilm formation was abolished and notably,  
107 citrate-mediated biofilm formation was also abolished (Fig. 1C).

108 Importantly, citrate enhanced biofilm formation is dependent on LapA (Fig. S2), indicating that  
109 citrate acts via the known LapD-LapG-LapA pathway. We used *P. fluorescens* strains containing  
110 a HA-tagged LapA variant to detect the amount of LapA at the cell surface as a function of the  
111 presence of citrate, as reported (7,10). In a WT *P. fluorescens* strain, citrate caused a 159%  
112 increase in LapA pixel density, which suggests a higher abundance of LapA at the cell surface in  
113 the presence of citrate (Fig. 1D). Only when GcbC was present and catalytically active did  
114 citrate cause an increase in cell surface-associated LapA (Fig. 1D). Taken together, these data  
115 show that citrate-mediated stimulation of biofilm formation in WT *P. fluorescens* Pf0-1 requires  
116 the active diguanylate cyclase GcbC, and is associated with enhanced cell surface LapA.

117

118 **The Putative Ligand Binding Site of the CACHE Domain is Important for GcbC-mediated**  
119 **Biofilm Formation.** CACHE domains are ubiquitous, extracellular, ligand-binding domains (13,  
120 14). In a previous study, the RXYF motif was found to be the most conserved feature among the  
121 characterized CACHE domains (15). The study found that the X residue is either negatively  
122 charged or polar, and the tyrosine residue of the RXYF motif points towards the ligand-binding  
123 site (15). A mutation of the RXYF motif of the CACHE domain of KinD, a histidine kinase in  
124 *Bacillus subtilis*, caused this microbe to lose its ability to respond to root exudates, forming  
125 reduced biofilm levels on tomato roots compared to a WT strain. (18). Thus, we predicted that  
126 a mutation within the RXYF motif of GcbC (Fig. S1) would result in impairment of citrate-  
127 dependent biofilm formation when expressed in a  $\Delta$ 4DGC mutant background. We mutated  
128 the tyrosine residue of the RXYF motif to a phenylalanine (Y141F) in a HA-tagged variant of  
129 GcbC (17) and expressed GcbC-Y141F-HA in the  $\Delta$ 4DGC mutant. Mutation of the RXYF motif  
130 resulted in the inability of GcbC to promote biofilm formation or respond to citrate (Fig. 2A).  
131 We assessed the stability of the GcbC-Y141F variant, which showed a 70% reduction in level  
132 compared to WT GcbC (Fig. 2B).

133 We sought to identify the putative site where citrate might bind to GcbC using the known  
134 structures of CACHE domains (Fig. 2C, left; template PDB ID 3LIB.). Like in the other CACHE  
135 domains, the tyrosine residue of the RXYF motif of GcbC was predicted to point towards the  
136 ligand-binding site (Fig. 2C, Fig. S3). Furthermore, based on the CACHE domain model of GcbC,  
137 the amino acids R139, R162, and R172 were predicted to shape the predicted ligand-binding  
138 site (Fig. 2C, right). Based on the model, we predict that three arginine residues can coordinate  
139 the three carboxylic acid groups of citrate (Fig. 2C, left). R139 is also part of the RXYF motif.  
140 Each of the arginine residues forming the putative ligand site were mutated and introduced  
141 into the  $\Delta$ 4DGC mutant background. Mutating R172 (R172A and R172E) resulted in instability of  
142 GcbC (Table S1), however GcbC-R139A, GcbC-R139E, and GcbC-R162A were detected by  
143 Western blot, with GcbC-R139E variant present at  $\sim$ WT levels (Fig. 2D). The strain carrying  
144 GcbC-R139E variant did not show a significant enhancement of biofilm formation in the  
145 presence of citrate (Fig. 2E). Together, our data indicate that the RXYF motif and a putative  
146 citrate-binding arginine triad are critical for GcbC-dependent, citrate-mediated enhancement of  
147 biofilm formation. We further expanded our search for important conserved residues within  
148 the CACHE domain that were predicted based on alignments with other CACHE domain  
149 proteins, however the other twenty-seven mutant proteins we constructed were unstable  
150 (Table S1).

151

152 **Citrate-mediated Interaction of GcbC with LapD Enhances Synthesis of c-di-GMP.** In our  
153 published model, GcbC mediates biofilm formation by transferring c-di-GMP to LapD through  
154 physical interaction of the  $\alpha 5^{\text{GGDEF}}$  helix of GcbC with the  $\alpha 2^{\text{EAL}}$  helix of LapD (12). We asked  
155 whether citrate might exert its effect of stimulating biofilm formation via stabilization of the  
156 LapD-GcbC signaling complex. To test if citrate bolstered GcbC-LapD interaction, we exploited  
157 the bacterial two-hybrid system used to initially demonstrate interaction between these  
158 proteins. We did observe a modest but significant enhancement of LapD-GcbC interaction in  
159 the presence of citrate. No such enhancement was observed for the control interactions: LapD-  
160 Pfl01\_2295, or GcbC with two other LapD-like dual domain proteins (Fig. 3A). Citrate also did  
161 not enhance GcbC-GcbC dimerization (Fig. 3A), which is perhaps expected, as dimerization is  
162 required for diguanylate cyclase activity (19, 20). Further, the catalytically inactive variant of  
163 GcbC still showed citrate-stimulated interaction (Fig. 3B).

164 We further explored whether citrate could also enhance the diguanylate cyclase activity of  
165 GcbC. We used the bacterial two-hybrid (B2H) plasmids and strains to express GcbC and LapD  
166 outside of their native context, and to better focus on how the interaction of these two  
167 proteins might specifically impact GcbC's activity. The activity of GcbC was assessed by  
168 measuring the level of c-di-GMP extracted from the indicated strains. The level of c-di-GMP  
169 measured in the *E. coli* strain carrying the vector controls was  $<2$  pmol c-di-GMP/mg dry  
170 weight. This low background of c-di-GMP provided a useful tool to measure differences in c-di-  
171 GMP levels derived from GcbC in the presence and absence of citrate. GcbC alone did not

172 synthesize detectable levels of c-di-GMP and citrate did not promote c-di-GMP production (Fig.  
173 3C). Co-expression of GcbC with LapD resulted in ~ 20 pmol c-di-GMP/mg dry weight, and the  
174 level of c-di-GMP was significantly increased upon addition of citrate (Fig. 3C). The increase in c-  
175 di-GMP required catalytically active GcbC, and was specific to GcbC interacting with LapD (Fig.  
176 3C). Pfl01\_0192 is a dual domain protein and was shown to interact weakly with GcbC (Fig. 3A),  
177 but background levels of c-di-GMP were detected when GcbC and Pfl01\_0192 were co-  
178 expressed +/- citrate (Fig. 3C).

179 Given that stability of GcbC-R139E was equivalent to WT GcbC levels (Fig. 2D), we tested for  
180 interaction of GcbC-R139E with LapD. Mutation of the arginine residue in the RXYF motif did  
181 not affect basal GcbC-LapD interaction. However, citrate-enhanced interaction of GcbC-R139E-  
182 LapD interaction was significantly reduced (but not eliminated) compared to citrate-enhanced  
183 WT GcbC-LapD interaction (Fig. 3D). Thus, our data indicate that LapD-GcbC interaction  
184 enhances c-di-GMP production, and the addition of citrate stimulates both interaction of these  
185 proteins and c-di-GMP synthesis, likely via the CACHE domain of GcbC.

186

187 **The CACHE Domain Participates in GcbC-LapD Interaction.** Thus far, we showed the CACHE  
188 domain to be important for citrate-mediated biofilm formation via increasing GcbC-LapD  
189 interaction and enhance GcbC activity. In a previous study (12), the four point mutations,  
190 E477A, Q478A, F481A, K485A (Quad Alanine) were introduced to the surface-exposed  $\alpha 5^{GGDEF}$   
191 helix of GcbC and expressed in a  $\Delta 4DGC$  mutant background, which resulted in reduced biofilm  
192 formation of *P. fluorescens* due to reduced interaction with LapD (12). However, the GcbC-  
193 Quad Alanine mutant, expressed in the  $\Delta 4DGC$  mutant background still showed a significant  
194 citrate-mediated enhancement of biofilm formation (Fig. S4A), thus suggesting the possibility of  
195 a second interface of GcbC-LapD interaction that is enhanced by citrate.

196 We next assessed whether the CACHE domain was required for citrate-enhanced interaction  
197 between GcbC and LapD. The two transmembrane domains plus the periplasmic portion of  
198 GcbC showed only a modest level of dimerization with full length GcbC, which was not  
199 stimulated by citrate (Fig. S4B). Importantly, the periplasmic domain of GcbC interacted with  
200 LapD at a level similar to full length GcbC, but citrate-enhanced interaction was abolished (Fig.  
201 S4B). Together, these data indicated that CACHE domain is required but not sufficient for  
202 citrate-mediated, enhanced interaction of LapD and GcbC; however, this domain appears  
203 responsible for basal LapD-GcbC interaction.

204

205 **LapD Interacts With Numerous DGCs.** We next explored if the mechanism we defined for GcbC-  
206 LapD interactions might apply to any of the other 20 DGCs in *P. fluorescens*. We found that  
207 LapD is a central hub of DGC interaction; LapD interacts with a dozen different DGCs in a  
208 pairwise bacterial two-hybrid assay (Fig. 4A). Included among the twelve DGCs that interact

209 with LapD are Pfl01\_2295 and Pfl01\_2297, and the putative SadC homolog, Pfl01\_4451 (Fig.  
210 4A). SadC is a DGC identified for its role in the early stages of biofilm development in *P.*  
211 *aeruginosa* (21), and the  $\Delta sadC$  mutant of *P. aeruginosa* shows approximately a 50% reduction  
212 of global, cellular c-di-GMP levels compared to WT PA14 (22). We have not yet identified  
213 ligands that enhance interactions and/or activity of these other DGCs.

214

215 **Discussion.** A key open question relating to c-di-GMP signaling is understanding how specificity  
216 of an output is mediated in the context of up to dozens of enzymes or receptors making,  
217 breaking and binding this dinucleotide. Here, our data suggest that an extracellular ligand can  
218 modulate the activity of a DGC and do so via interaction with its cognate receptor. Our data are  
219 consistent with the model that citrate binding to the CACHE domain of GcbC enhances  
220 interaction with LapD. We propose the increased interaction between GcbC and LapD to have  
221 two important consequences: stabilization of a complex that allows direct transfer of the GcbC-  
222 generated c-di-GMP signal to the LapD receptor, and equally importantly, activation of the DGC  
223 activity of GcbC. Indeed, when expressed in a heterologous system, GcbC showed almost no  
224 capacity to synthesize c-di-GMP; it is only when co-expressed with LapD that a significant  
225 increase in c-di-GMP synthesis above background was detected. An additional boost in cyclic  
226 nucleotide production was measured when citrate was added to the medium in a strain co-  
227 expressing GcbC and LapD, indicating that the enhanced GcbC-LapD interaction also enhanced  
228 DGC activity. Furthermore, recent work from the Sondermann lab (23) proposed a model  
229 where GcbC and LapD, along with LapG, form a large signaling complex that facilitates LapD-  
230 GcbC interactions (Fig. 4B). Thus, our data supports a model for a ligand-based mechanism to  
231 enhance signaling specificity by c-di-GMP in the context of a large signaling complex.

232 We have identified citrate as a potential ligand that binds to GcbC via its CACHE domain. There  
233 is an abundance of CACHE domains present on signal transduction proteins (14), including  
234 proteins involved in c-di-GMP signaling, and yet, the role of CACHE domains fused to DGCs is  
235 poorly understood. Our data show that citrate is a potential ligand for the CACHE domain  
236 associated with GcbC. *P. fluorescens*, a plant symbiont, forms biofilms on tomato roots and the  
237 root exudates contain organic acids including citrate (24, 25, 26). It is possible, however, that  
238 GcbC senses other organic acids. For example, in *P. syringe* pv. *actinidiae*, the CACHE domain  
239 PscD (PDB ID: 5G4Z) binds glycolate, acetate, propionate, and pyruvate (27). It is also possible  
240 that different ligands sensed via the CACHE domain of GcbC can dictate which proteins interact  
241 with this DGC (Fig. 4A). Together, our data indicate that extracellular ligands, via their ability to  
242 modulate protein-protein interactions and/or DGC activity, can modulate c-di-GMP signaling  
243 specificity. Given the large number of ligand-binding domains associated with c-di-GMP-  
244 metabolizing proteins, the data presented here could represent a general means of regulating  
245 c-di-GMP-controlled outputs by enhancing the signaling between c-di-GMP-metabolizing  
246 enzymes and their effectors.

247 Enzymes that make c-di-GMP are part of a complex network, with LapD as a central receptor for  
248 DGCs to interact with (Fig. 4A). It is highly unlikely that the twelve DGCs that make up this DGC  
249 network all interact with LapD without regulation to control signaling specificity. A more likely  
250 scenario could be that ligands are used as a signal to regulate signaling of a DGC to interact with  
251 LapD and outcompete with one another. It is also possible that other ligand-mediated  
252 mechanisms exist, such as a ligand-enhanced homodimerization of a DGC. Further  
253 characterizing and identifying what small molecules DGCs respond to could provide insight into  
254 how c-di-GMP signaling specificity is regulated within this complex signaling network. For  
255 example, we envision a scenario wherein a “cloud” of weakly interacting DGCs can increase  
256 specific interaction with their receptor in response to appropriate environmental signals,  
257 concomitantly boosting c-di-GMP production, ligand-specific signaling and biofilm formation.  
258 Our work provides insight of a ligand-based mechanism of how signaling specificity occurs  
259 among a complex network of enzymes and receptors that make, break, and bind c-d-GMP.

260

## 261 **Material and Methods**

262 **Strains and Media.** Bacterial strains used in this study are listed in Table S2, and were cultured  
263 and maintained in lysogeny broth (LB) or on 1.5% agar LB plates. *P. fluorescens* was grown at  
264 30°C and *E. coli* was grown at 37°C. *E. coli* S17-1- $\lambda$ -pir was used for maintenance and transfer of  
265 plasmids. *Saccharomyces cerevisiae* strain InvSc1 was used for plasmid modification as  
266 described previously (28, 29). K10T-1 medium was prepared as described previously (30).  
267 Sodium citrate was added to 1.5% agar LB plates and K10T-1 media to a final concentration of  
268 13.6 mM (0.4% wt/vol) for all the experiments described. The following antibiotics were used  
269 as indicated: gentamycin (15 $\mu$ g/mL for *E. coli*, 30 $\mu$ g/mL for *P. fluorescens*), kanamycin (50 $\mu$ g/mL  
270 for *E. coli*), and carbenicillin (50 $\mu$ g/mL for *E. coli*).

271 **Biofilm Assay.** Biofilm assays were performed as described previously (1). *P. fluorescens* Pf0-1  
272 strains were incubated in K10T-1 medium with and without 0.4% sodium citrate, as indicated,  
273 for 6 hours at 30°C. Biofilms were stained with 0.1% crystal violet, washed with water and then  
274 solubilized with a 45% methanol, 45% dH<sub>2</sub>O, and 10% glacial acetic acid solution. The optical  
275 density (OD) of the solubilized crystal violet solution was measured at 550 nm to determine the  
276 amount of biofilm formed.

277 **Dot Blot LapA Localization Assay.** Localization of LapA to the cells surface was measured using  
278 a HA-tagged LapA variant integrated into the chromosome of *P. fluorescens* as described  
279 previously (7, 10, 31). Overnight LB-grown cultures were subcultured in 5mL K10T-1 medium in  
280 the presence and absence of 0.4% sodium citrate for 6 hours at 30°C. Samples were normalized  
281 by the lowest OD<sub>600</sub> value.

282 **Bacterial Two-Hybrid Assay.** Bacterial two-hybrid assays were performed using *E. coli* BTH101  
283 cells based on a previously described system (32). Briefly, ~100ng of each bacterial two hybrid



284 plasmid was cotransformed into *E. coli* BTH101 by electroporation. *E. coli* BTH101 cells were  
285 incubated on LB agar supplemented with 50µg/mL kanamycin, 50µg/mL carbenicillin, and  
286 0.5mM isopropyl β-D-1-thiogalactopyranoside (IPTG) for 24 hours at 30°C. At 24 hours, either β-  
287 galactosidase or c-di-GMP levels were quantified as described below. β-galactosidase assays  
288 were performed as exactly described previously (12) to quantify the extent of protein-protein  
289 interaction. β-galactosidase levels are presented in Miller Units.

290 **c-di-GMP Quantification Assay.** c-di-GMP was extracted from *E. coli* BTH101 cells after  
291 incubation on LB agar plates at 30°C for 24 hours. The cells were scraped from the plate surface  
292 with 1 mL of dH<sub>2</sub>O, then pelleted and resuspended in 0.250 mL nucleotide extraction buffer  
293 (40% methanol, 40% acetonitrile, 20% dH<sub>2</sub>O, and 0.1N formic acid), followed by incubation at -  
294 20°C for 1 hour. Cells were pelleted again and the reaction was neutralized by transfer of 0.2  
295 ml nucleotide extract to 8µl of 15% NH<sub>4</sub>CO<sub>3</sub>. Nucleotide extracts were vacuum-dried and  
296 resuspended in 0.2 mL HPLC grade H<sub>2</sub>O. c-di-GMP concentration was analyzed by liquid  
297 chromatography-mass spectrometry and compared to a standard curve of known c-di-GMP  
298 concentration, as reported (12). The moles of c-di-GMP were normalized to the dry weight of  
299 the cell pellet from which the nucleotides were extracted.

300 **Statistical Analysis.** Student's t-test was used to test for statistical significance. P < 0.05; \*, P <  
301 0.01; \*\*, P < 0.001; \*\*\*

302

303 **Acknowledgement.** We thank members of the lab for helpful discussions.

304

#### 305 **Literature Cited.**

- 306 1. O'Toole GA, Kolter R (1998) Initiation of biofilm formation in *Pseudomonas fluorescens*  
307 WCS365 proceeds via multiple, convergent signaling pathways: A genetic analysis. *Mol*  
308 *Microbiol* 28: 449-461.
- 309 2. Pruss BM, Besemann C, Denton A, Wolfe AJ (2006) A complex transcription network  
310 controls the early stages of biofilm development by *Escherichia coli*. *J Bacteriol* 188(11):  
311 3731-3739.
- 312 3. Römling U, Gomelsky M, Galperin MY (2005) c-di-GMP: The dawning of a novel bacterial  
313 signaling system. *Mol Microbiol* 57(3): 629-639.
- 314 4. Baker AE, Diepold A, Kuchma SL, Scott JE, Ha DG, Orazi G, Armitage JP, O'Toole GA  
315 (2016) A PilZ domain protein FlgZ mediates cyclic-di-GMP-dependent swarming motility  
316 control in *Pseudomonas aeruginosa*. *J Bacteriol* 198(13): 1837-1846.
- 317 5. Ross P, Weinhouse H, Aloni Y, Michaeli D, Weinberger-Ohana P, Mayer R, Braun S, de  
318 Vroom E, van der Marel GA, van Boom JH, Benziman M (1987) Regulation of cellulose  
319 synthesis in *Acetobacter xylinum* by cyclic diguanlyic acid. *Nature* 325(6101): 279-281.

- 320 6. Merrit JH, Brothers KM, Kuchma SL, O'Toole HA (2007) SadC reciprocally influences  
321 biofilm formation and swarming motility via modulation of exopolysaccharide  
322 production and flagellar function. *J Bacteriol* 189(22): 8154-8164.
- 323 7. Monds RD, Newell PD, Gross RH, O'Toole GA (2007) Phosphate-dependent modulation  
324 of c-di-GMP levels regulates *Pseudomonas fluorescens* Pf0-1 biofilm formation by  
325 controlling secretion of the adhesin LapA. *Mol Microbiol* 63(3): 659-679.
- 326 8. Martínez-Gil M, Ramos-González MI, Espinosa-Urgel M (2014) Roles of cyclic di-GMP  
327 and the Gac system in transcriptional control of the genes coding for *Pseudomonas*  
328 *putida* adhesins LapA and LapF. *J Bacteriol* 196(8): 1484-1495.
- 329 9. Hinsa SM, Espinosa-Urgel M, Ramos JL, O'Toole HA (2003) Transition from reversible to  
330 irreversible attachment during biofilm formation by *Pseudomonas fluorescens* WCS365  
331 requires an ABC transporter and a large secreted protein. *Mol Microbiol* 49: 905-918.
- 332 10. Newell PD, Monds RD, O'Toole GA (2009) LapD is a bis-(3'-5')-cyclic dimeric GMP-  
333 binding protein that regulates surface attachment by *Pseudomonas fluorescens* Pf0-1.  
334 *Proc Natl Acad Sci USA* 106(9): 3461-3466.
- 335 11. Navarro MV, Newell PD, Krasteva PV, Chatterjee D, Madden DR, O'Toole GA,  
336 Sondermann HA (2011) Structural basis for c-di-GMP-mediated inside-out signaling  
337 controlling periplasmic proteolysis. *PLoS Biol* 9(2): e1000588. doi: 10.1371.
- 338 12. Dahlstrom KM, Giglio KM, Collins AJ, Sondermann H, O'Toole GA (2015) Contribution of  
339 physical interactions to signaling specificity between a diguanylate cyclase and its  
340 effector. *mBio* 6(6):e01978-15. doi:10.1128/mBio.01978-15.
- 341 13. Anantharamn V, Aravind L (2000) Cache – a signaling domain common to animal Ca(2+)-  
342 channel subunits and a class of prokaryotic chemotaxis receptors. *Trends Biochem Sci*  
343 25(11): 535-537.
- 344 14. Upadhyay AA, Fleetwood AD, Adebali O, Finn RD, Zhulin IB (2016) Cache domains that  
345 are homologous to, but different from PAS domains comprise the largest superfamily of  
346 extracellular sensors in prokaryotes. *PLoS Comput Biol* 12(4): e1004862. doi:  
347 10.1371/journal.pcbi.1004862.
- 348 15. Zhang Z, Hendrickson WA (2010) Structural characterization of the predominant family  
349 of histidine kinase sensor domains. *J Mol Biol* 400(3): 335-353.
- 350 16. Boyd CD, Chatterjee D, Sondermann H, O'Tool GA (2012) LapG, required for modulating  
351 biofilm formation by *Pseudomonas fluorescens* Pf0-1, is a calcium-dependent protease. *J*  
352 *Bacteriol* 194(16): 4406-4414.
- 353 17. Newell PD, Yoshioka S, Hvorecny KL, Monds RD, O'Toole GA (2011) Systematic analysis  
354 of diguanylate cyclases that promote biofilm formation by *Pseudomonas fluorescens*  
355 Pf0-1. *J Bacteriol* 193(18): 4685-4698.
- 356 18. Chen Y, Cao S, Chai Y, Clardy J, Kolter R, Guo JH, Losick R (2012) A *Bacillus subtilis* sensor  
357 kinase involved in triggering biofilm formation on the roots of tomato plants. *Mol*  
358 *Microbiol* 85(3): 418-430.

- 359 19. Chan C, Paul R, Samoray D, Amiot NC, Giese B, Jenal U, Schirmer T (2004) Structural  
360 basis of activity and allosteric control of diguanylate cyclase. *Proc Natl Acad Sci USA*  
361 101(49): 17084-17089.
- 362 20. Ryjenkov DA, Tarutina M, Moskvina OV, Gomelsky M (2005) Cyclic diguanylate is a  
363 ubiquitous signaling molecule in bacteria: insights into biochemistry of the GGDEF  
364 protein domain. *J Bacteriol* 187(5): 1792-1798.
- 365 21. Merritt JH, Brothers KM, Kuchma SL, O'Toole GA (2007) SadC reciprocally influences  
366 biofilm formation and swarming motility via modulation of exopolysaccharide  
367 production and flagellar function. *J Bacteriol* 189(22): 8154-8164.
- 368 22. Merritt JH, Ha DG, Cowles KN, Lu W, Morales DK, Rabinowitz J, Gitai Z, O'Toole GA  
369 (2010) Specific control of *Pseudomonas aeruginosa* surface-associated behaviors by two  
370 c-di-GMP diguanylate cyclases. *Mbio* 1(4): e00183-10. doi:10.1128/mBio.00183-10.
- 371 23. Cooley RB, O'Donnell JP, Sondermann H (2016) Coincidence detection and bi-directional  
372 transmembrane signaling control a bacterial second messenger receptor. *Elife* 5: e21848  
373 doi: 10.7554/eLife.21848.
- 374 24. Haas D, Défago G (2005) Biological control of soil-borne pathogens by fluorescent  
375 pseudomonads. *Nat Rev Microbiol* 3(4): 307-319.
- 376 25. Jones DL (1998) Organic acids in the rhizosphere – a critical review. *Plant Soil* 205: 25-  
377 44.
- 378 26. de Weert S, Vermeiren H, Mulders IH, Kuiper I, Hendrickx N, Bloemberg GV,  
379 Vanderleyden J, De Mot R, Lugtenberg BJ (2002) Flagella-driven chemotaxis towards  
380 exudate components is an important trait for tomato root colonization by *Pseudomonas*  
381 *fluorescens*. *Mol Plant Microbe Interact* 15(11): 1173-1180.
- 382 27. Brewster JL, McKellar JL, Finn TJ, Newman J, Peats TS, Gerth ML (2016) Structural basis  
383 for ligand recognition by a Cache chemosensory domain that mediates carboxylate  
384 sensing in *Pseudomonas syringae*. *Sci Rep* 6:35198. doi: 10.1038/srep35198.
- 385 28. Shanks RMA, Calazza NC, Hinsa SM, Toutain CM, O'Toole GA (2006) *Saccharomyces*  
386 *cerevisiae*-based molecular tool kit for manipulation of gram-negative bacterial genes.  
387 *Appl Environ Microbiol* 72(7): 5027-5036.
- 388 29. Bascom-Slack CA, Dawson D (1998) A physical assay for detection of early meiotic  
389 recombination intermediates in *Saccharomyces cerevisiae*. *Mol Gen Genet* 258: 512-520.
- 390 30. Monds RD, Newell PD, Schwartzman JA, O'Toole GA (2006) Conservation of the Pho  
391 regulon in *Pseudomonas fluorescens* Pf0-1. *Appl Environ Microbiol* 72(3): 1910-1924.
- 392 31. Newell PD, Boyd CD, Sodermann H, O'Toole GA (2011) A c-di-GMP effector system  
393 control cell adhesion by inside-out signaling and surface protein cleavage. *PLoS Biol* 9(2):  
394 e1000587. doi: 10.1371/journal.pbio.1000587.
- 395 32. Karimova G, Pidoux J, Ullmann A, Ladant D (1998) A bacterial two-hybrid system based  
396 on a reconstituted signal transduction pathway. *Proc Natl Acad Sci USA* 95: 5752-5756.
- 397 33. Shultz J, Milpetz F, Bork P, Ponting CP (1998) SMART, a simple modular architecture  
398 research tool: Identification of signaling domains. *Proc Natl Acad Sci USA* 95: 5857-5864.

- 399        34. Ulrich LE, Zhulin IB (2010) The MiST2 database: a comprehensive genomics resource on  
400            microbial signal transduction. *Nucleic Acids Res* 38: D401-407 doi:10.1093/nar/gkp940.  
401        35. Simon R, Preifer U, Puhler A (1983) A broad host range mobilization system for *in vivo*  
402            genetic engineering: transposon mutagenesis in gram negative bacteria. *Nat Biotechnol*  
403            1: 784-791.
- 404
- 405

406 **Figures**

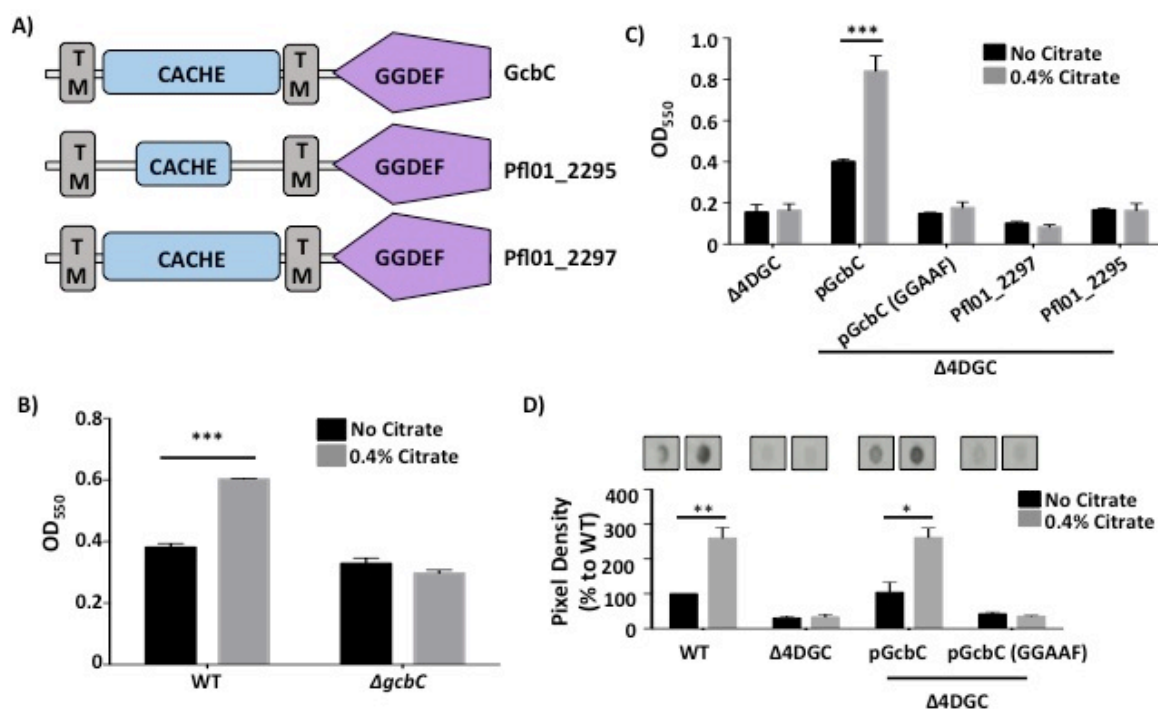

407 **Fig. 1. Citrate stimulates biofilm formation via GcbC.** (A) Predicted domain organization of  
 408 GcbC, Pfl01\_2295, and Pfl01\_2297 as predicted by SMART (33). The domains are indicated in  
 409 each block. TM = transmembrane domain. Analysis of Pfl01\_2295 by MiST2 (34) predicts a  
 410 second transmembrane domain. (B) Biofilm formation by WT *P. fluorescens* and the  $\Delta gcbC$   
 411 mutant in the presence and absence of 0.4% citrate (n = 3;  $\pm$  SD). (C) Biofilm formation by the  
 412 indicated strains +/- citrate. In this panel, the  $\Delta 4DGC$  mutant background is used, with the WT  
 413 GcbC and the catalytically inactive variant (GGAAF) introduced into this mutant on plasmids.  
 414 Pfl01\_2297 and Pfl01\_2295 are two other CACHE-domain containing diguanylate cyclases in *P.*  
 415 *fluorescens* that serve as controls. (D) Quantification of cell-surface levels of LapA in the  
 416 presence and absence of 0.4% citrate. Representative blots are shown. For panels B, C, and D,  
 417 the values shown are an average of 3 replicates ( $\pm$  SD); horizontal black bars indicate a P value  
 418 of either <0.05 (\*), <0.01 (\*\*), or <0.001 (\*\*\*) with a student's t-test compared to the condition  
 419 without citrate comparing each strain without versus with citrate.

420

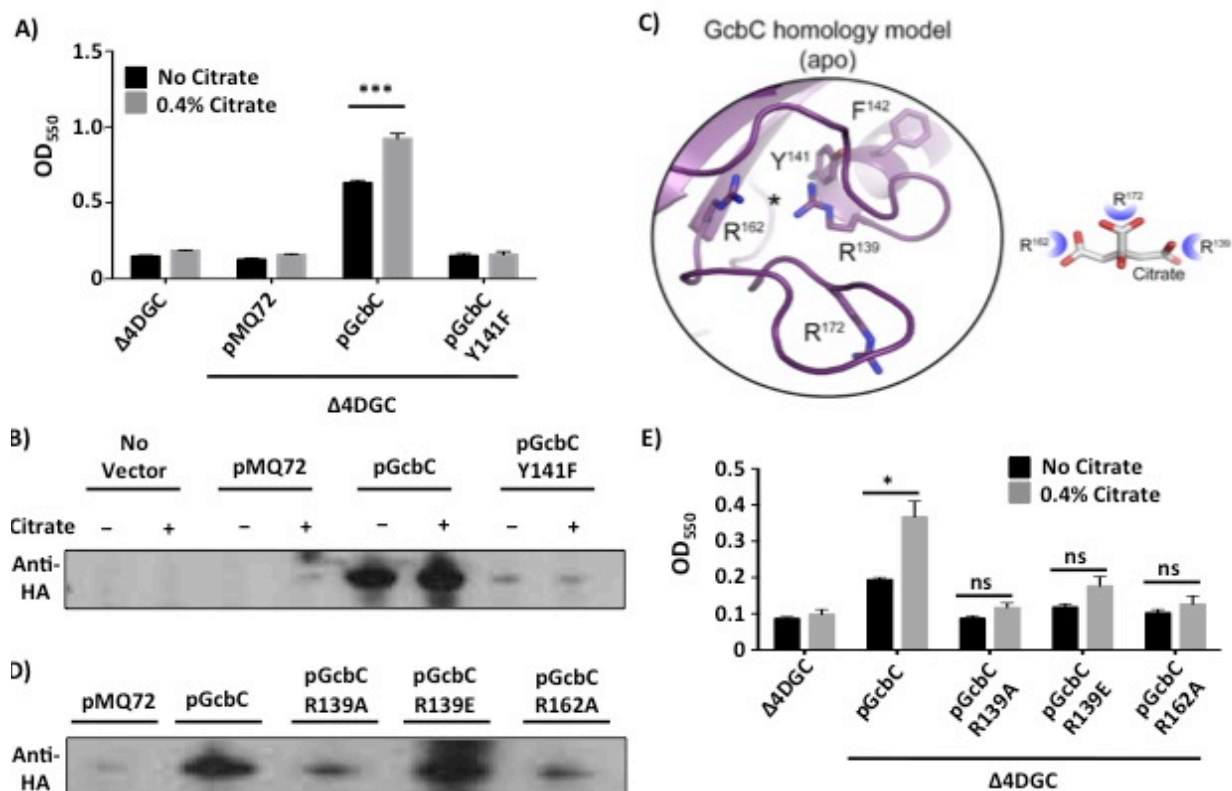

421  
 422 **Fig. 2. Effects of CACHE domain mutations on biofilm formation.** (A) Quantitation of the effect  
 423 of CACHE domain mutant, GcbC Y141F, on biofilm formation in the presence and absence of  
 424 citrate. (B) Western blot to assess the relative stability of GcbC-HA and GcbC-Y141F-HA in the  
 425 presence and absence of citrate. (C) Homology model of the CACHE domain of GcbC based on  
 426 rpHK1S-Z16 (PDB ID: 3LIF) and vpHK1S-Z8 (PDB ID: 3LID) (see Figure S3) to identify the putative  
 427 ligand-binding site. (D) Western blot assessment of the relative stability of GcbC-R139A-HA,  
 428 GcbC-R139E-HA and GcbC-R162A-HA. (E) Quantitative analysis of biofilm formation by strains  
 429 expressing the indicated CACHE domain mutants in the presence and absence of citrate. For  
 430 panels A and E, data shown is the average of three replicates ( $\pm$  SD); horizontal black bars  
 431 indicate a P value of either <0.05 (\*) or <0.001 (\*\*\*) with a student's t-test comparing each  
 432 strain without versus with citrate.

433

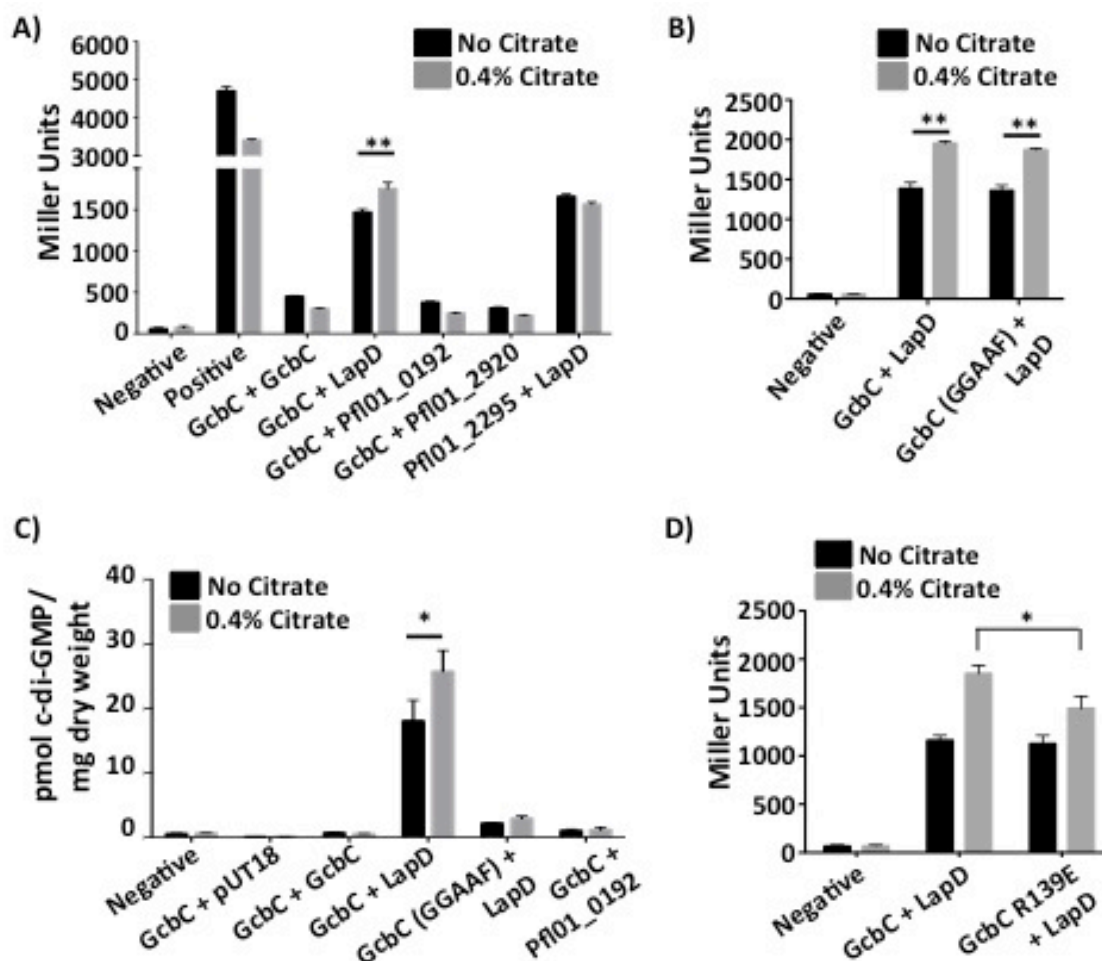

434 **Fig. 3. Citrate-mediated biofilm enhancement.** (A) The effect of citrate on interaction with the  
 435 indicated proteins is compared by the B2H assay. Pfl01\_2295 = CACHE domain-containing DGC;  
 436 Pfl01\_0192 = GGDEF and EAL domain-containing protein; Pfl01\_2920 = phosphodiesterase.  
 437 Briefly, the proteins of interest are fused to two halves of the catalytic domain of an adenylate  
 438 cyclase, T25 and T18, from *Bordetella pertussis* are transformed into *E. coli* BTH101 cells (32).  
 439 Plasmids pKT25 and pUT18C are the vector-only controls. If the two proteins interact, the  
 440 adenylate cyclase activity is reconstituted, promoting cAMP synthesis, which in turn activates  
 441 transcription of *lacZ*. The  $\beta$ -galactosidase activity is assessed using X-gal as a substrate, which  
 442 serves as a read out for the degree of interaction (32). Citrate did not enhance interaction of  
 443 the vectors or of the positive control (GCN4 leucine zipper protein). Citrate only enhanced the  
 444 interaction between LapD and GcbC. (B) The effect of catalytic activity of GcbC on interaction  
 445 with LapD were compared in the presence and absence of 0.4% citrate. (C) c-di-GMP  
 446 production in *E. coli* BTH101 was determined for strains carrying the indicated proteins. Only  
 447 co-expression of LapD-GcbC showed appreciable accumulation of c-di-GMP, which was  
 448 stimulated by added citrate. (D) The effect of R139E CACHE mutation on interaction with LapD  
 449 in the presence and absence of citrate. For panels B, C, D, and E, all experiments were  
 450 performed in triplicate ( $\pm$  SD), with an indicated P value of either <0.05 (\*) or <0.01 (\*\*) with a  
 451 student's t-test comparing each strain without versus with citrate.

452

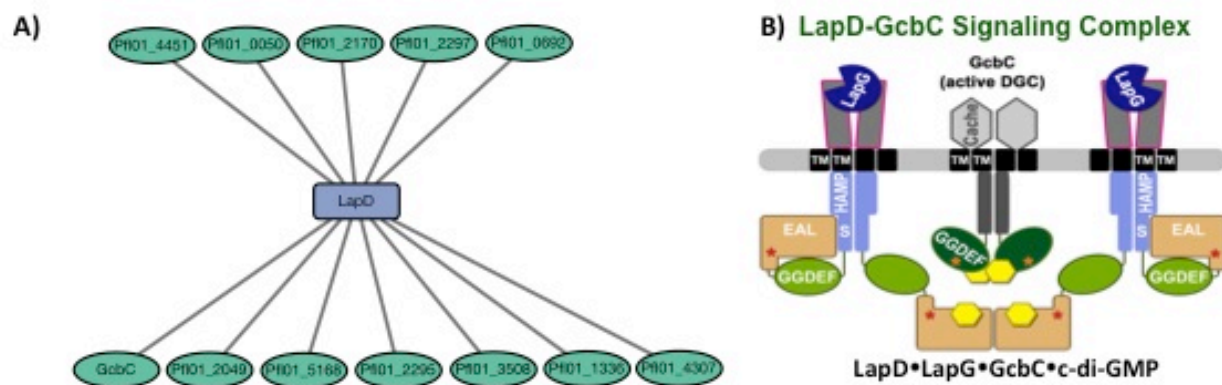

453 **Fig. 4. LapD interacts with multiple DGCs.** (A) Interaction map of DGCs that interact with LapD  
454 by 20 hours by bacterial-two-hybrid assay. Interaction map constructed using XXXXX. (B) A  
455 model of a GcbC, LapD, LapG signaling “basket” complex (23).
